# Supplementary material for: Effects of Trophic Acclimation on Growth and Expression Profiles of Genes Encoding Enzymes of Primary Metabolism and Plastid Transporters of Chlamydomonas reinhardtii
Source: MDPI journal article supplement (doi:10.3390/life13061398), 2023-06-15
Supplement: s1 [file s1]

**Table S1.** Genes, products, and primers.

| Locus tag          | Symbol        | Product                                                         | Primers                                            |
|--------------------|---------------|-----------------------------------------------------------------|----------------------------------------------------|
| CHLRE_10g424500v5  | <i>CPK4</i>   | ribokinase                                                      | GCTTCCCGACCTTCTTTG<br>CCGCCCACAATGATGATG           |
| CHLRE_01g026250v5  | <i>AGA1</i>   | alpha-galactosidase                                             | GATGACTGCTGGATGGAGAA<br>TACACGCCGAACCTTGAGG        |
| CHLRE_08g359350v5  | <i>CARB1</i>  | acetyl-CoA carboxylase, biotin<br>carboxylase subunit           | GCGGCGAGATTGCTGTG<br>GGGATGTTGAGGTAGGACT           |
| CHLRE_04g216950v5  | <i>KASIII</i> | 3-oxoacyl-[acyl-carrier-<br>protein] synthase III               | GCCTCCTACGCCAACATCCACAT<br>GCATCACCAGCCAGTCCACAGA  |
| CHLRE_17g709850v5  | <i>ACK2</i>   | acetate kinase                                                  | GCGTCTTGGTCTCTGAAC<br>ACATTCTCCTTGATGAAATCC        |
| CHLRE_09g396700v5  | <i>ACK1</i>   | acetate kinase                                                  | CCTGTCGGGTCGGCAGTG<br>GTGGTCCTTGCGGGAATCT          |
| CHLRE_12g552200v5  | <i>PHOB</i>   | starch phosphorylase                                            | GTTGTGGAGGGCGACGA<br>TGTGGCAGCGGTGTTCT             |
| CHLRE_01g055408v5  | <i>ACS2</i>   | acetyl CoA synthetase                                           | GCAGGACAAGCAACAGTACGAGG<br>TCCAGGCAGTTGTAGGCGATG   |
| CHLRE_03g181500v5  | <i>STA11</i>  | 4-alpha-glucanotransferase                                      | GCTCATCAAGGACGGACTGC<br>ACTGCCACCACGCCAACT         |
| CHLRE_02g080200v5  | <i>TRK1</i>   | transketolase                                                   | CGACGCCATCAACAAGTCCAAGT<br>TCGTAGCCAGTCAGGTGCATCAT |
| CHLRE_12g501000v5  | <i>TPT</i>    | triose<br>phosphate/phosphate<br>translocator                   | GTCAAGTCGTGGCAGCAGTT<br>GAAGAAGGGCGTCGTGGAG        |
| CHLRE_06g263850v5  | <i>PPT2</i>   | phosphate/phosphoenolpyruv<br>ate translocator                  | GCTCTGCAAAGGCACCAAGTTCAA<br>GCCCTTATCGGACTCGCCATCT |
| CHLRE_06g307150v5  | <i>AMYB1</i>  | beta-amylase                                                    | AGCCAGTGCGTTCTCAGA<br>AAGCGGTCTCTGTCTATCATT        |
| CHLRE_12g519100v5  | <i>ACX2</i>   | acetyl-CoA carboxylase<br>carboxyl transferase<br>subunit alpha | CGGTATCGGCAGCATCAAT<br>ACATCTCACGCAGGTTTAC         |
| CHLRE_17g715250v5  | <i>BCC1</i>   | acetyl-coa biotin<br>carboxyl carrier                           | CCGAGGAGGTTGAGGCTGCTA<br>CAGGCTGAAACGCTTGCTCTTC    |
| CHLRE_17g713350v5  | <i>OMT1</i>   | oxoglutarate:malate antiporter                                  | GGAGTGCCTGAACAACAAC<br>AGAAGTAGTGCGAGTAGAAGT       |
| CHLRE_02g088600v5  | <i>ACLB1</i>  | ATP citrate lyase, subunit B                                    | CGAGACTCCATCTGTCGCTGCT<br>CTGCGGAAGGAGGCGTAGTTGAT  |
| CHLRE_01g071662v5  | <i>ACS1</i>   | acetyl CoA synthetase                                           | CTGACTCTATTGTTGCGAAGG<br>CGTTGATGTTGGACTGGC        |
| CHLRE_03g149100v5  | <i>CIS2</i>   | citrate synthase                                                | AACACCACCGCCGTCATC<br>TCACATCAATCACCTCCGTCG        |
| CHLRE_02g075700v5* | <i>RPL19</i>  | ribosomal protein L19                                           | TCGGTTCTGAACTGCGGTCTG<br>CGGGCTGCTTACGGAAGATGA     |
| CHLRE_03g195600v5  | <i>TRE1</i>   | alpha,alpha-trehalase                                           | GACTCCTACTGGGTCATCCTGGG<br>GCTGGCTGCGGTTGGTGTA     |

|                   |              |                                                                       |                                                        |
|-------------------|--------------|-----------------------------------------------------------------------|--------------------------------------------------------|
| CHLRE_03g206800v5 | <i>HXT1</i>  | hexose transporter                                                    | CTGATCGGCGTGCTGCTGTTC<br>ACGGAGGATGAGAAGTAGACCAGG<br>G |
| CHLRE_14g630847v5 | <i>TAL2</i>  | transaldolase                                                         | CCGCCTTTCCACCATTGT<br>GCTGTTGCTGTTCTTGCC               |
| CHLRE_05g241850v5 | <i>ACLA1</i> | ATP citrate lyase, subunit A                                          | TGCCTATCCAGGTGGTTCAGTTCA<br>CGGGCGGTGGCGAAATCAAT       |
| CHLRE_02g141400v5 | <i>PCK1</i>  | phosphoenolpyruvate<br>carboxykinase                                  | TTATGAACAACGCCCCGATCC<br>GCTCAGTCACGCCATCTCAGT         |
| CHLRE_01g045550v5 | <i>APE2</i>  | triose phosphate translocator                                         | GCTCGTCCGTGCTGTTCTTCA<br>CCTTCTTGCTGTGCTTGCT           |
| CHLRE_12g486600v5 | <i>MEX1</i>  | maltose exporter-like protein                                         | GATGGAAGGGCGACGGACAAC<br>CATTCTGGACGACTTGCGGAAGC       |
| CHLRE_06g260450v5 | <i>DIT</i>   | 2-oxoglutarate/malate<br>translocator                                 | GCGGCGACCACCAATGAGAT<br>GCGACTTGATGATGGGCACAAAGA       |
| CHLRE_02g117500v5 | <i>HXK1</i>  | hexokinase                                                            | CACTCGGCATCCTCATCCTA<br>CGTCGGCAGCATCATCAT             |
| CHLRE_05g234550v5 | <i>FBA3</i>  | fructose-1,6-<br>bisphosphate aldolase                                | GCCCTGATGATGAAGTCGTCCG<br>CAACGGTGCCAGCGGTCTT          |
| CHLRE_01g029300v5 | <i>TPIC1</i> | triose phosphate isomerase                                            | ACGAGGTGGTGGCGAAGAAGACT<br>GGCGTCCAGAACCTTGAACACAGA    |
| CHLRE_02g120100v5 | <i>RBCS1</i> | ribulose-1,5-bisphosphate<br>carboxylase/oxygenase<br>small subunit 1 | CTGAAGCCCGCCGTCAAGG<br>AGAGGAGGCAGGTAGGAGAAGGT         |
| CHLRE_10g444700v5 | <i>SBE3</i>  | starch branching enzyme                                               | CCAAGTGCCTCACCATCG<br>GCTTCATCACCTCAATCCACTT           |

**Table S2.** Cell density.

| Days after inoculation | CD 10 <sup>6</sup> cells/mL |              | t-test          |
|------------------------|-----------------------------|--------------|-----------------|
| mixotrophic            |                             |              |                 |
|                        | MM                          | MA           | <i>p</i> -value |
| 1                      | 0.031±0.0033                | 0.012±0.004  | 0.0031          |
| 2                      | 1.1±0.13                    | 0.43±0.14    | 0.00031         |
| 3                      | 4.2±1.2                     | 2.0±0.19     | 0.03            |
| 4                      | 8.6±1.3                     | 6.7±0.54     | 0.2             |
| 5-7 *                  | 9.41±0.95                   | 8.46±0.94    | 0.27            |
| autotroph <sup>c</sup> |                             |              |                 |
|                        | AM                          | AA           | <i>p</i> -value |
| 3                      | 0.15±0.058                  | 0.016±0.0054 | 0.018           |
| 6                      | 0.8±0.21                    | 0.35±0.14    | 0.016           |
| 9                      | 1.9±0.34                    | 1.4±0.21     | 0.049           |
| 12                     | 3.1±0.24                    | 2.9±0.39     | 0.48            |
| 17-23*                 | 4.28±0.54                   | 4.59±0.65    | 0.27            |

\*stationary phase

**Table S3.** Fold changes in relative gene expression and adjusted *p*-value from *t*-test for mixotrophic cultures.

|               | 1<br>days |       | 2<br>days |       | 4<br>days |         | 6<br>days |       |
|---------------|-----------|-------|-----------|-------|-----------|---------|-----------|-------|
| gene          | FC        | MM/MA | FDR       | FC    | MM/MA     | FDR     | FC        | FDR   |
|               |           |       |           | MM/MA |           |         | MM/MA     |       |
| <i>CPK4</i>   | 0.4       |       | 0.031     | 0.26  |           | 0.0012  | 0.68      | 0.52  |
| <i>CARB1</i>  | 4.49      |       | 0.023     | 0.12  |           | 0.096   | 3.83      | 0.48  |
| <i>KASIII</i> | 0.53      |       | 0.11      | 0.37  |           | 0.00096 | 1.29      | 0.65  |
| <i>PHOB</i>   | 2.04      |       | 0.013     | 0.6   |           | 0.011   | 1.1       | 0.89  |
| <i>ACX2</i>   | 0.68      |       | 0.25      | 0.13  |           | 0.0051  | 0.48      | 0.48  |
| <i>TRE1</i>   | 27.16     |       | 0.037     | 0.1   |           | 0.0051  | 1.7       | 0.068 |
| <i>ACK1</i>   | 1.73      |       | 0.16      | 0.18  |           | 0.015   | 0.89      | 0.71  |
| <i>ACK2</i>   | 0.43      |       | 0.063     | 0.38  |           | 0.027   | 0.49      | 0.48  |
| <i>ACLA1</i>  | 0.55      |       | 0.077     | 0.48  |           | 0.16    | 0.39      | 0.28  |
| <i>ACLB1</i>  | 0.89      |       | 0.64      | 0.6   |           | 0.072   | 1.13      | 0.71  |
| <i>ACS1</i>   | 8.65      |       | 0.022     | 1.92  |           | 0.039   | 1.01      | 0.99  |
| <i>ACS2</i>   | 1.73      |       | 0.02      | 0.51  |           | 0.015   | 1.13      | 0.71  |
| <i>AGA1</i>   | 0.97      |       | 0.85      | 0.05  |           | 0.0014  | 0.98      | 0.92  |
| <i>AMYB1</i>  | 2.04      |       | 0.047     | 0.15  |           | 0.0037  | 0.95      | 0.86  |
| <i>APE2</i>   | 0.56      |       | 0.057     | 0.21  |           | 0.0051  | 0.88      | 0.65  |
| <i>BCC1</i>   | 0.58      |       | 0.043     | 0.14  |           | 0.046   | 0.6       | 0.5   |
| <i>CIS2</i>   | 2.76      |       | 0.015     | 0.1   |           | 0.012   | 1.13      | 0.71  |
| <i>FBA3</i>   | 0.5       |       | 0.03      | 0.09  |           | 0.012   | 0.83      | 0.65  |
| <i>HXK1</i>   | 0.29      |       | 0.015     | 0.37  |           | 0.046   | 0.1       | 0.28  |
| <i>HXT1</i>   | 0.29      |       | 0.03      | 0.32  |           | 0.029   | 0.85      | 0.65  |
| <i>DIT</i>    | 6.14      |       | 0.016     | 0.06  |           | 0.046   | 1.63      | 0.52  |
| <i>MEX1</i>   | 0.37      |       | 0.03      | 0.33  |           | 0.0033  | 0.61      | 0.48  |
| <i>OMT1</i>   | 0.24      |       | 0.019     | 0.23  |           | 0.0012  | 0.54      | 0.48  |
| <i>PCK1</i>   | 0.88      |       | 0.32      | 0.19  |           | 0.0018  | 1.07      | 0.86  |
| <i>TPT</i>    | 2.86      |       | 0.022     | 0.28  |           | 0.012   | 1.7       | 0.5   |
| <i>RBCS1</i>  | 3.01      |       | 0.12      | 1.67  |           | 0.046   | 2.05      | 0.52  |
| <i>SBE3</i>   | 1.57      |       | 0.015     | 0.18  |           | 0.0072  | 1.21      | 0.65  |
| <i>STA11</i>  | 0.78      |       | 0.33      | 0.21  |           | 0.0067  | 0.71      | 0.65  |
| <i>TAL2</i>   | 5.63      |       | 0.016     | 0.18  |           | 0.0087  | 2.83      | 0.19  |
| <i>TPIC1</i>  | 1.22      |       | 0.38      | 0.86  |           | 0.039   | 0.98      | 0.95  |
| <i>PPT2</i>   | 0.84      |       | 0.51      | 0.25  |           | 0.033   | 1.34      | 0.65  |
| <i>TRK1</i>   | 4.48      |       | 0.022     | 0.35  |           | 0.18    | 1.54      | 0.4   |

**Table S4.** Fold changes in relative gene expression and adjusted *p*-value from *t*-test for autotrophic cultures.

| 3 days        |          |       | 6 days       |        | 12 days  |       | 20 days      |        |
|---------------|----------|-------|--------------|--------|----------|-------|--------------|--------|
| gene          | FC AM/AA | FDR   | FC AM/A<br>A | FDR    | FC AM/AA | FDR   | FC AM/A<br>A | FDR    |
| <i>CPK4</i>   | 0        | 0.12  | 0.31         | 0.11   | 0.57     | 0.2   | 0.01         | 0.15   |
| <i>CARB1</i>  | 5.23     | 0.12  | 1.45         | 0.67   | 0.54     | 0.24  | 3.02         | 0.48   |
| <i>KASIII</i> | 0.98     | 0.96  | 0.78         | 0.35   | 1        | 1     | 103.11       | 0.014  |
| <i>PHOB</i>   | 0.72     | 0.57  | 0.84         | 0.7    | 0.08     | 0.18  | 2.71         | 0.33   |
| <i>ACX2</i>   | 1.66     | 0.77  | 0.14         | 0.11   | 0.26     | 0.064 | 6.51         | 0.0072 |
| <i>TRE1</i>   | 0.01     | 0.57  | 6.02         | 0.35   | 31.43    | 0.064 | NA           | NA     |
| <i>ACK1</i>   | 0.75     | 0.84  | 0.94         | 0.91   | 2.06     | 0.14  | 1.41         | 0.66   |
| <i>ACK2</i>   | 0.94     | 0.96  | 0.78         | 0.42   | 1.45     | 0.36  | 1.65         | 0.64   |
| <i>ACLA1</i>  | 1.04     | 0.96  | 0.91         | 0.9    | 3.59     | 0.19  | 0.94         | 0.93   |
| <i>ACLB1</i>  | 1.39     | 0.77  | 0.28         | 0.3    | 0.72     | 0.2   | 2.86         | 0.42   |
| <i>ACS1</i>   | 0.18     | 0.14  | 0.45         | 0.38   | 1.09     | 0.89  | 0.62         | 0.42   |
| <i>ACS2</i>   | 1.26     | 0.77  | 0.89         | 0.83   | 0.26     | 0.12  | 1.54         | 0.32   |
| <i>AGA1</i>   | 3.3      | 0.12  | 0.49         | 0.38   | 0.04     | 0.24  | 9.91         | 0.071  |
| <i>AMYB1</i>  | 1.32     | 0.77  | 0.84         | 0.7    | 0.8      | 0.25  | 2.12         | 0.067  |
| <i>APE2</i>   | 1.17     | 0.87  | 0.72         | 0.52   | 1.09     | 0.3   | 6.15         | 0.13   |
| <i>BCC1</i>   | 2.12     | 0.57  | 0.89         | 0.7    | 1.81     | 0.2   | 1.92         | 0.5    |
| <i>CIS2</i>   | 0.95     | 0.96  | 0.34         | 0.19   | 0.76     | 0.25  | 2.12         | 0.066  |
| <i>FBA3</i>   | 0.93     | 0.96  | 0.66         | 0.3    | 1.23     | 0.44  | 1.05         | 0.93   |
| <i>HXK1</i>   | 0.74     | 0.77  | 0.95         | 0.91   | 0.74     | 0.36  | 2.44         | 0.46   |
| <i>HXT1</i>   | 0.26     | 0.46  | 0.87         | 0.7    | 0.55     | 0.064 | 3.56         | 0.071  |
| <i>DIT</i>    | 4.31     | 0.31  | 0.22         | 0.0043 | 0.46     | 0.36  | 4.03         | 0.067  |
| <i>MEX1</i>   | 1.3      | 0.8   | 0.26         | 0.11   | 0.93     | 0.92  | 3.76         | 0.41   |
| <i>OMT1</i>   | 0.77     | 0.77  | 0.68         | 0.52   | 1.61     | 0.25  | 0.58         | 0.44   |
| <i>PCK1</i>   | 0.87     | 0.92  | 0.42         | 0.18   | 0.69     | 0.25  | 3.32         | 0.039  |
| <i>TPT</i>    | 2.82     | 0.031 | 1.09         | 0.91   | 0.37     | 0.11  | 2.25         | 0.014  |
| <i>RBCS1</i>  | 1.01     | 0.96  | 1.86         | 0.35   | 0.39     | 0.31  | 2.75         | 0.39   |
| <i>SBE3</i>   | 5.62     | 0.18  | 0.34         | 0.29   | 0.2      | 0.064 | 3.15         | 0.08   |
| <i>STA11</i>  | 0.75     | 0.84  | 0.37         | 0.35   | 0.15     | 0.25  | 0            | 0.014  |
| <i>TAL2</i>   | 0.44     | 0.49  | 0.81         | 0.73   | 0.33     | 0.24  | 3.87         | 0.039  |
| <i>TPIC1</i>  | 1.44     | 0.37  | 1.04         | 0.94   | 0.38     | 0.25  | 2.48         | 0.24   |
| <i>PPT2</i>   | 8.57     | 0.031 | 1.55         | 0.35   | 1.01     | 1     | 1.09         | 0.93   |
| <i>TRK1</i>   | 1.05     | 0.96  | 0.77         | 0.7    | 0.4      | 0.1   | 2.23         | 0.42   |

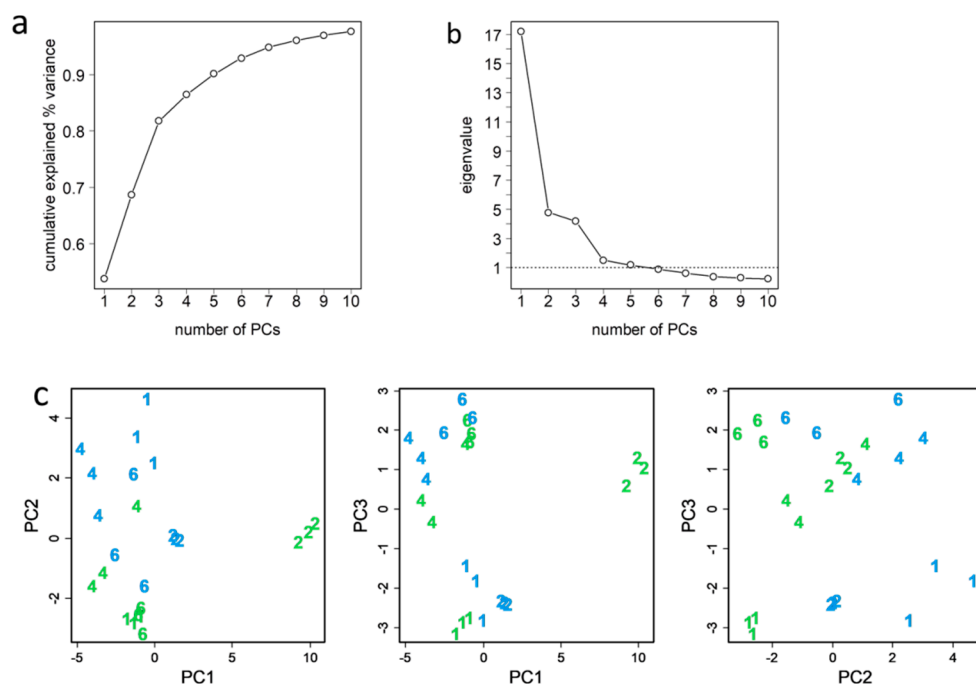

**Figure S1.** PCA of expression profiles from mixotrophic *C. reinhardtii* cultures. Curves showing the dependence of the explained variance (a) on the number of principal components and the eigenvalues of the components (b), (c) scores plots of the first 3 principal components. Numbers—time after inoculation, days; color—type of acclimation: green indicates autotrophy, blue indicates mixotrophy.

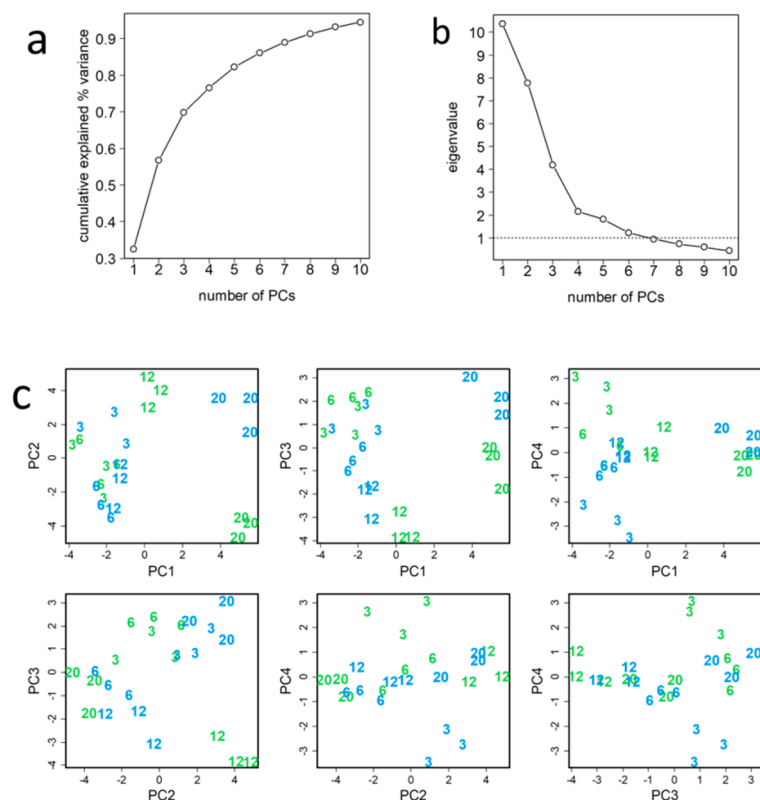

**Figure S2.** PCA of expression profiles from autotrophic *C. reinhardtii* cultures. Curves showing the dependence of the explained variance (a) on the number of principal components and the eigenvalues of the components (b), (c) scores plots of the first 4 principal components. Numbers—time after inoculation, days; color—type of acclimation: green indicates autotrophy, blue indicates mixotrophy.

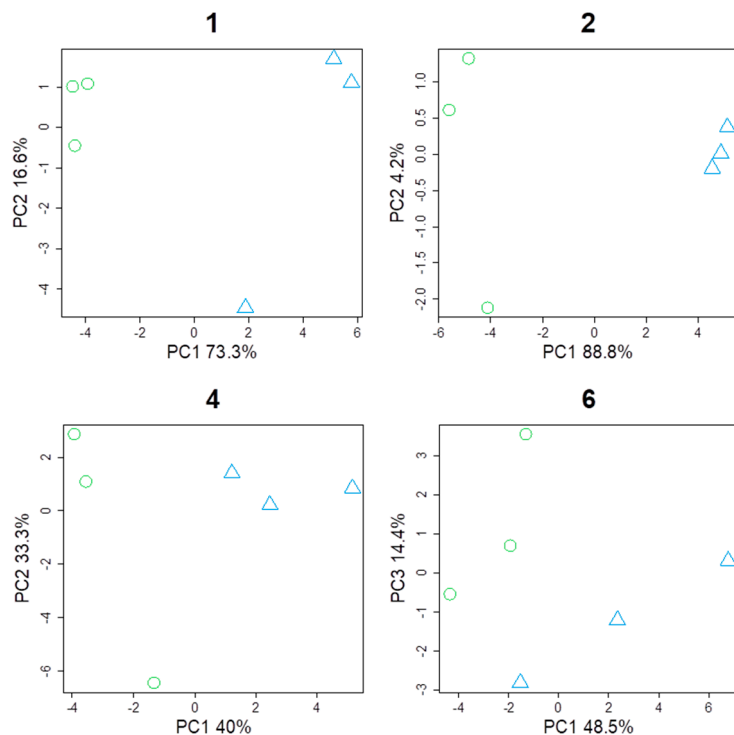

**Figure S3.** PCA score plots derived from the analysis of the expression profiles from mixotrophic batch cultures of *C. reinhardtii* of four ages acclimated to mixotrophy (blue triangles) and autotrophy (green circles). Samples were taken at 1, 2, 4, and 6 days after inoculation (numbers above plots).

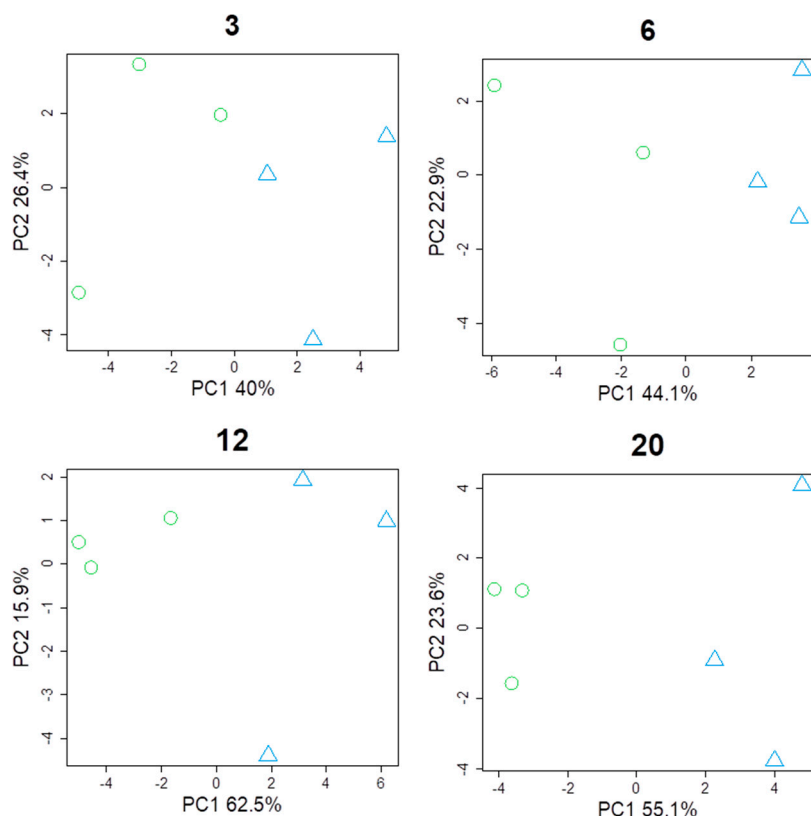

**Figure S4.** PCA score plots derived from the analysis of the expression profiles from autotrophic batch cultures of *C. reinhardtii* of four ages acclimated to mixotrophy (blue triangles) and autotrophy (green circles). Samples were taken at 3, 6, 12, and 20 days after inoculation (numbers above plots).

**Table S5.** *t*-test of differences in PC1 values in pairwise comparison of cultures with different acclimation at each time point (Figures S3 and S4 above).

| DAI        | <i>p</i> | fdr    |
|------------|----------|--------|
| mixotrophy |          |        |
| 1          | 0.018    | 0.029  |
| 2          | 0.00056  | 0.0045 |
| 4          | 0.018    | 0.029  |
| 6          | 0.16     | 0.16   |
| autotrophy |          |        |
| 3          | 0.032    | 0.044  |
| 6          | 0.039    | 0.045  |
| 12         | 0.012    | 0.029  |
| 20         | 0.0061   | 0.024  |
